# Supplementary material
Source: PubMed Central journal article supplement (PMC4515412)
Supplement: NIHMS647913-supplement-1.pdf [file NIHMS647913-supplement-1.pdf]

## Supplementary Figure S1

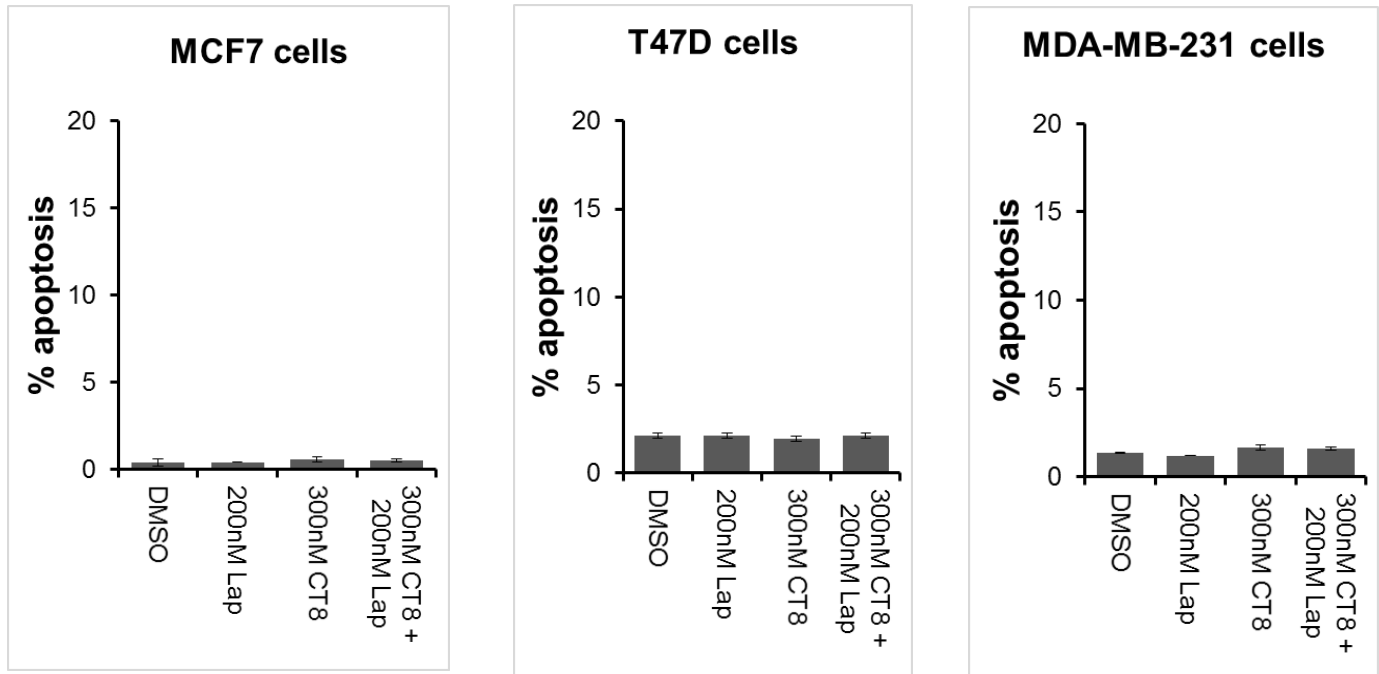

The indicated cancer cell lines were selected because they are not HER2-amplified and their survival is not HER2-HER3-dependent. They were treated with the indicated drugs for 72 hours and the fraction of apoptotic cells quantified by FACS analysis of DNA degradation.
